# Supplementary material for: Base-amplifying silicone resins generating aliphatic secondary amines autocatalytically: synthesis, characterization and application to positive-working photoresists
Source: Royal Society of Chemistry journal article supplement (doi:10.1039/c4py01096e), 2014-09-12
Supplement: c4py01096e1.pdf [file c4py01096e1.pdf]

Electronic Supplementary Information

Title: **Base-amplifying silicone resins generating aliphatic secondary amines autocatalytically: synthesis, characterization and application to positive-working photoresists**

Authors: K. Arimitsu\*,<sup>a</sup> H. Kobayashi,<sup>a</sup> M. Furutani,<sup>a</sup> T. Gunji,<sup>a</sup> and Y. Abe<sup>a</sup>

<sup>a</sup> Department of Pure and Applied Chemistry, Tokyo University of Science, 2641 Yamazaki, Noda, Chiba 278-8510, JAPAN.

E-mail: arimitsu@rs.noda.tus.ac.jp

Decomposition behaviour of films of polymer **1** containing 10 wt% of PBG

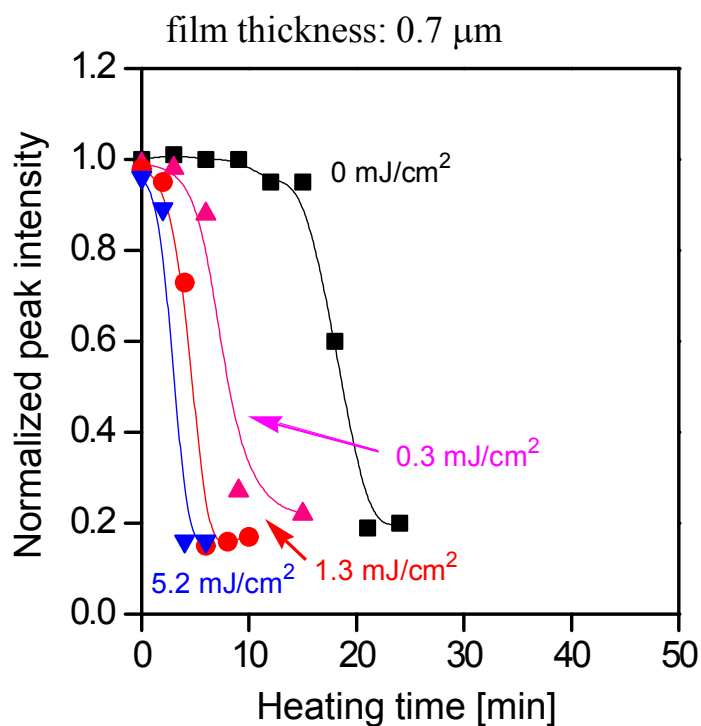

**Fig. S1** Time course for the consumption of peak area of polymer **1** containing 10 wt% of PBG heated at 100 °C, with and without UV irradiation.
